# Supplementary material for: Molecular Imaging of Oxygenation Changes during Immunotherapy in Combination with Paclitaxel in Triple Negative Breast Cancer
Source: MDPI journal article supplement (doi:10.3390/biomedicines11010125), 2023-01-04
Supplement: s1 [file s1]

## SUPPLEMENT

### Expanded Methods: Flow Cytometry

Following compensation, forward scatter height (FSC-H) on the x-axis versus side scatter height (SSC-H) was the gating strategy used to identify all cells. Next, FSC-H  $\times$  FSC-area (A) was used to gate for single cells, SSC-H  $\times$  SSC-A was used to gate for singlets, Dead  $\times$  SSC-A was used to gate for live cells/dead negative, and CD45  $\times$  SSC-A was used to gate for CD45<sup>+</sup> populations of hematopoietic derived cells (lymphocytes). F4/80  $\times$  SSC-A was used to gate for all macrophages. CD80 and CD206  $\times$  SSC-A were used to gate for M1 and M2 macrophages, respectively. CD3  $\times$  SSC-A was used to gate for all T-cells. CD4 and CD8  $\times$  SSC-A were used to gate for CD4<sup>+</sup> and CD8<sup>+</sup> T-cells, respectively. CD4  $\times$  CD25 was used to gate for proliferating CD4<sup>+</sup> T-cells.

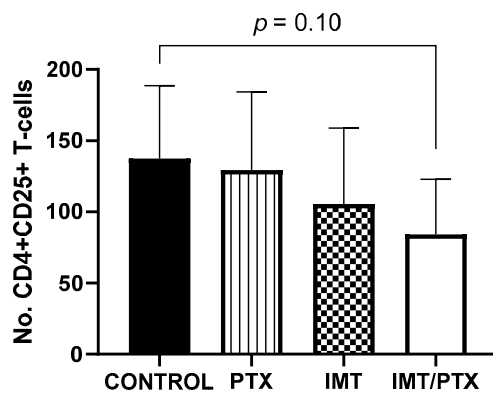

Supplemental Figure S1. No significant differences in proliferating CD4<sup>+</sup> T-cells were found between treatment groups. Treatment of TNBC tumors with combination IMT/PTX decreased the numbers of proliferating CD4<sup>+</sup> T-cells, indicated by CD25<sup>+</sup> positivity, compared to untreated control tumors; however, no significant differences in proliferating CD4<sup>+</sup> T-cell numbers were observed between treatment groups. Mean  $\pm$  SD (multiple t-tests).
